# Supplementary material
Source: HighWire-hosted journal article supplement (https://bmjopen.bmj.com/content/12/8/e059956)
Supplement: inline-supplementary-material-1 [file inline-supplementary-material-1.pdf]

**Supplementary Table 1.** Trends in crude, age-standardized ischemic stroke incidence rate per 100,000 person-year by sex, 2010-2019

| Sex         | Year | Crude Rate per 100,000 | Age standardized rate per 100,000 (2005 population of the year of Korea) | Age standardized rate per 100,000 (WHO standard population) |
|-------------|------|------------------------|--------------------------------------------------------------------------|-------------------------------------------------------------|
| Men         | 2010 | 106.7 (105.2, 108.2)   | 101.0 (99.6,102.4)                                                       | 106.3 (104.8, 107.8)                                        |
|             | 2011 | 106.7 (105.2, 108.2)   | 98.4 (97.0,99.7)                                                         | 103.3 (101.9, 104.8)                                        |
|             | 2012 | 105 (103.5, 106.4)     | 93.4 (92.1,94.6)                                                         | 98.2 (96.9, 99.6)                                           |
|             | 2013 | 105.6 (104.1, 107.0)   | 91.8 (90.5,93.0)                                                         | 96.6 (95.2, 97.9)                                           |
|             | 2014 | 105.4 (104.0, 106.9)   | 89.3 (88.0,90.5)                                                         | 93.8 (92.6, 95.1)                                           |
|             | 2015 | 103.9 (102.5, 105.2)   | 85.7 (84.6,86.9)                                                         | 90.1 (88.9, 91.4)                                           |
|             | 2016 | 108.3 (106.9, 109.7)   | 87.1 (86.0,88.3)                                                         | 91.5 (90.3, 92.7)                                           |
|             | 2017 | 113.5 (112.1, 115.0)   | 88.7 (87.6,89.9)                                                         | 93.3 (92.1, 94.5)                                           |
|             | 2018 | 115.8 (114.4, 117.3)   | 87.7 (86.6,88.9)                                                         | 92.4 (91.3, 93.6)                                           |
|             | 2019 | 124.8 (123.3, 126.3)   | 92.2 (91.1,93.4)                                                         | 97.1 (95.9, 98.3)                                           |
| P for trend |      | 0.073                  | 0.040                                                                    | 0.040                                                       |
| Women       | 2010 | 90.1 (88.8, 91.5)      | 67.6 (66.5,68.6)                                                         | 71.8 (70.8, 72.9)                                           |
|             | 2011 | 90.0 (88.7, 91.3)      | 65.9 (64.9,66.9)                                                         | 70.1 (69.0, 71.1)                                           |
|             | 2012 | 86.5 (85.2, 87.8)      | 61.3 (60.4,62.3)                                                         | 65.3 (64.3, 66.3)                                           |
|             | 2013 | 84.6 (83.4, 85.9)      | 58.3 (57.3,59.2)                                                         | 62.1 (61.2, 63.1)                                           |
|             | 2014 | 85.0 (83.8, 86.3)      | 56.8 (55.9,57.7)                                                         | 60.6 (59.6, 61.5)                                           |
|             | 2015 | 83.5 (82.3, 84.7)      | 54.1 (53.3,55.0)                                                         | 57.9 (57.1, 58.8)                                           |
|             | 2016 | 83.0 (81.8, 84.3)      | 52.1 (51.3,53.0)                                                         | 55.8 (54.9, 56.6)                                           |
|             | 2017 | 85.3 (84.1, 86.6)      | 52.0 (51.2,52.8)                                                         | 55.7 (54.8, 56.5)                                           |
|             | 2018 | 85.3 (84.1, 86.5)      | 50.7 (49.9,51.5)                                                         | 54.4 (53.5, 55.2)                                           |
|             | 2019 | 93.4 (92.1, 94.7)      | 55.0 (54.2,55.9)                                                         | 58.7 (57.8, 59.6)                                           |
| P for trend |      | 0.431                  | < 0.001                                                                  | < 0.001                                                     |

**Supplementary Table 2. Trends in crude ischemic stroke incidence rate per 100,000 person-year of age groups by sex, 2010-2019**

|                    | Men   |       |       |       |                    |       | Women |       |       |       |       |         |         |       |
|--------------------|-------|-------|-------|-------|--------------------|-------|-------|-------|-------|-------|-------|---------|---------|-------|
|                    | 20-29 | 30-39 | 40-49 | 50-59 | 60-69 <sup>†</sup> | 70-79 | 80-   | 20-29 | 30-39 | 40-49 | 50-59 | 60-69   | 70-79   | 80-   |
| <b>2010</b>        | 4.2   | 15.9  | 55.8  | 132.9 | 272.1              | 478.3 | 666.1 | 3.8   | 10.3  | 33.8  | 72.1  | 170.1   | 369.9   | 536.1 |
| <b>2011</b>        | 4.7   | 16.7  | 55.7  | 128.6 | 268.7              | 455.4 | 624.3 | 4.3   | 11.7  | 32.7  | 68.8  | 166.1   | 353.3   | 530.2 |
| <b>2012</b>        | 4.7   | 16.3  | 49.8  | 126.9 | 250.2              | 439.7 | 589.2 | 4.9   | 10.9  | 30.1  | 68.2  | 148.9   | 326.5   | 492.2 |
| <b>2013</b>        | 5.2   | 16.7  | 49.7  | 123.5 | 240.6              | 435.4 | 584.1 | 4.6   | 10.9  | 28    | 63.2  | 137.2   | 316.5   | 486.3 |
| <b>2014</b>        | 5.8   | 17.4  | 49.1  | 121.6 | 229.6              | 418.9 | 559.4 | 4.8   | 11    | 28.3  | 59.6  | 131.2   | 306.3   | 488.9 |
| <b>2015</b>        | 4.6   | 15.5  | 48.5  | 116   | 221.1              | 404   | 547.2 | 5.9   | 10.4  | 24.6  | 58    | 122.2   | 295.9   | 476.2 |
| <b>2016</b>        | 3.8   | 15.8  | 50.6  | 124.4 | 217.3              | 406.5 | 551.5 | 3.2   | 9.4   | 25.6  | 55.9  | 115.3   | 287.8   | 476.4 |
| <b>2017</b>        | 3.3   | 16.4  | 51.4  | 124.5 | 226.6              | 400.8 | 592.1 | 3.8   | 10.3  | 25.4  | 54.4  | 114.8   | 278.8   | 492.5 |
| <b>2018</b>        | 4.6   | 14.9  | 49.3  | 123.6 | 225.7              | 395.8 | 596.6 | 4.9   | 11.3  | 25.1  | 54    | 103.7   | 272.4   | 484.2 |
| <b>2019</b>        | 5.3   | 18.7  | 50.3  | 133.9 | 233.8              | 411.6 | 601.1 | 6.7   | 11.8  | 30    | 60.5  | 117.2   | 273.5   | 502.4 |
| <b>P-for trend</b> | 0.788 | 0.929 | 0.425 | 0.531 | 0.156              | 0.002 | 0.531 | 0.128 | 0.655 | 0.025 | 0.002 | < 0.001 | < 0.001 | 0.245 |

**Supplementary Table 3. Trends in age-standardized incidence rate of ischemic stroke per 100,000 person-year according to household income, 2010-2019**

|                    | Medical aid beneficiaries | 1st               | 2nd               | 3rd               | 4th               | 5th               |
|--------------------|---------------------------|-------------------|-------------------|-------------------|-------------------|-------------------|
| 2010               | 126.3 (120.5, 132.0)      | 89.4 (87.0, 91.8) | 91.0 (88.4, 93.6) | 86.4 (84.1, 88.6) | 86.3 (84.3, 88.2) | 84.0 (82.4, 85.5) |
| 2011               | 121.9 (116.3, 127.5)      | 87.8 (85.5, 90.1) | 88.9 (86.3, 91.4) | 88.2 (85.9, 90.5) | 82.5 (80.6, 84.4) | 80.1 (78.6, 81.6) |
| 2012               | 118.3 (112.5, 124.2)      | 84.6 (82.3, 86.8) | 84.0 (81.7, 86.4) | 82.0 (79.8, 84.1) | 79.5 (77.7, 81.4) | 74.9 (73.4, 76.3) |
| 2013               | 118.1 (112.0, 124.2)      | 80.0 (77.9, 82.0) | 82.0 (79.6, 84.3) | 80.9 (78.8, 83.0) | 78.0 (76.2, 79.8) | 71.4 (70.0, 72.7) |
| 2014               | 114.6 (108.5, 120.7)      | 77.9 (75.9, 79.9) | 80.4 (78.1, 82.6) | 78.8 (76.8, 80.8) | 74.9 (73.2, 76.6) | 70.6 (69.3, 72.0) |
| 2015               | 109.3 (103.4, 115.1)      | 74.8 (72.8, 76.7) | 76.3 (74.1, 78.5) | 75.1 (73.2, 77.1) | 71.9 (70.3, 73.5) | 68.1 (66.8, 69.5) |
| 2016               | 105.8 (100.4, 111.1)      | 76.2 (74.2, 78.1) | 77.2 (75.2, 79.3) | 75.3 (73.4, 77.3) | 70.7 (69.2, 72.3) | 66.3 (65.0, 67.6) |
| 2017               | 119.6 (113.3, 125.9)      | 75.6 (73.8, 77.5) | 76.5 (74.5, 78.6) | 76.6 (74.7, 78.4) | 71.7 (70.2, 73.3) | 67.1 (65.8, 68.4) |
| 2018               | 119.1 (113.2, 125.1)      | 75.8 (73.9, 77.6) | 76.5 (74.5, 78.6) | 73.9 (72.1, 75.7) | 69.7 (68.2, 71.2) | 65.2 (64.0, 66.5) |
| 2019               | 128.5 (122.0, 135.0)      | 82.0 (80.2, 83.8) | 78.4 (76.2, 80.5) | 77.0 (75.2, 78.9) | 76.8 (75.2, 78.4) | 68.9 (67.6, 70.2) |
| <b>P-for trend</b> | 0.531                     | 0.025             | 0.003             | 0.010             | 0.003             | 0.002             |

**Supplementary Table 4. Trends in rate ratio of ischemic stroke incidence rates between medical aid beneficiaries and highest income group**

| Year | Rate ratio (C.I.) |
|------|-------------------|
| 2010 | 1.50 (1.43, 1.58) |
| 2011 | 1.52 (1.45, 1.60) |
| 2012 | 1.58 (1.50, 1.67) |
| 2013 | 1.65 (1.57, 1.75) |
| 2014 | 1.62 (1.53, 1.72) |
| 2015 | 1.60 (1.52, 1.70) |
| 2016 | 1.60 (1.51, 1.68) |
| 2017 | 1.78 (1.68, 1.89) |
| 2018 | 1.83 (1.73, 1.93) |
| 2019 | 1.87 (1.77, 1.97) |
